# Supplementary material for: Transcriptome analysis and immune gene expression of channel catfish (Ictalurus punctatus) fed diets with inclusion of frass from black soldier fly larvae
Source: Front Physiol. 2024 Jan 9;14:1330368. doi: 10.3389/fphys.2023.1330368 (PMC10803510; doi:10.3389/fphys.2023.1330368)
Supplement: Supplementary file 1 [file DataSheet1.XLSX]

## Sheet: Table of contents
		Supplemental File 1: Transcriptome analysis and immune gene expression of channel catfish (Ictalurus punctatus) fed black soldier fly larvae frass-supplemented diets
		Nithin Muliya Sankappa, Miles D. Lange, Mediha Yildirim-Aksoy, Rashida Eljack, Benjamin H. Beck, Jason W. Abernathy
		Correspondence: Jason W. Abernathy; jason.abernathy@usda.gov
													Highlighted colours indicate the commonly expressed genes between the treatments
		50 g/kg INT			Comparison beteween 0 g/kg intestine and 50 g/kg intestine								Commonly expressed genes in 50 g/kg LIV 300 g/kg LIV:
													Commonly expressed genes in 300 g/kg IN 50 g/kg INT:
		300 g/kg INT			Comparison beteween 0 g/kg intestine and 300 g/kg intestine								Commonly expressed genes in 300 g/kg INT 300 g/kg LIV:
													Commonly expressed genes in 50 g/kg INT 300 g/kg LIV:
		50 g/kg LIV			Comparison beteween 0 g/kg liver and 50 g/kg liver								Commonly expressed genes in 300 g/kg IN 50 g/kg LIV :
		300 g/kg LIV			Comparison beteween 0 g/kg liver and 300 g/kg liver
		qPCR foldchange			Gill, Intestine, Liver and Kidney foldchange and P-value
		Commonly expressed genes
		Uniquely expressed genes

## Sheet: 50 g kg INT
Gene	Fold change	padj	Description
XM_017475906.3	-90.7258	2.21501e-12	up-regulator of cell proliferation-like (LOC108269832), mRNA
LOC124628311	-50.6958	0.0155623	carcinoembryonic antigen-related cell adhesion molecule 5-like
LOC128633000	-37.8948	0.0399231	carcinoembryonic antigen-related cell adhesion molecule 5-like
LOC108261596	-29.0716	0.00696422	B-cell receptor CD22-like
XM_053685643.1	-25.1244	5.44448e-09	plexin-C1 (LOC108261274), mRNA
XM_047154544.2	-18.6332	2.21501e-12	NLR family CARD domain-containing protein 3 (LOC124627791), mRNA
NM_001329275.1	-13.7542	0.0455667	putative claudin-24 (LOC108270652), mRNA
NM_001329262.1	-12.1545	0.0400018	rhamnose-binding lectin-like (LOC108264892), mRNA
XM_053681436.1	-12.1057	0.00955434	high affinity immunoglobulin gamma Fc receptor I (LOC128632991), mRNA
XM_053678919.1	-10.6133	0.0425349	histone H1-like (LOC128630393), mRNA
LOC128629329	-9.34372	0.0155623	Ig heavy chain V region TEPC 1017-like
XM_053685452.1	-3.52083	0.0425349	pancreatic secretory granule membrane major glycoprotein GP2 (LOC108273582), mRNA
XM_017491137.3	-3.12599	0.000184422	tripartite motif-containing protein 16 (LOC108278018), mRNA
XM_053687280.1	-3.03096	0.00803213	tripartite motif-containing protein 16 (LOC108277536), transcript variant X1, mRNA
XM_017467197.2	-3.01912	0.00280758	E3 ubiquitin-protein ligase NEURL3 (LOC108265088), mRNA
XM_017469413.3	-2.77711	0.00955434	signal transducer and activator of transcription 1b (stat1b), mRNA
XM_017475348.3	-2.71104	2.08131e-05	radical S-adenosyl methionine domain containing 2 (rsad2), mRNA
XM_017452956.3	-2.33488	0.00371031	asteroid homolog 1a (aste1a), mRNA
XM_017480489.3	-2.23091	5.12623e-05	succinyl-CoA:glutarate-CoA transferase (sugct), transcript variant X2, mRNA
XM_017476915.3	3.44	0.00955434	epoxide hydrolase 2, cytoplasmic (ephx2), mRNA
XM_053687397.1	4.1776	0.00984967	apolipoprotein A1/A4/E family protein (zgc:162608), mRNA
NM_001200229.1	4.62848	0.0400018	toll-like receptor 5 (tlr-5), mRNA
XM_017459061.3	4.78233	0.0116425	myostatin a (mstna), mRNA
XM_017450295.3	5.82107	0.000158979	inter-alpha-trypsin inhibitor heavy chain 3a, tandem duplicate 2 (itih3a.2), mRNA
XM_053678020.1	6.58245	0.0182617	reelin (reln), mRNA
NM_001200879.1	7.65803	5.46115e-07	homogentisate 1,2-dioxygenase (hgd), mRNA
XM_017484464.3	9.08387	0.00186974	glucose-6-phosphatase catalytic subunit 1a, tandem duplicate 1 (g6pc1a.1), mRNA
XM_053682799.1	13.0957	0.0425349	ribosomal protein L13a (rpl13a), transcript variant X1, mRNA
XM_017471414.3	29.9408	0.00984967	cystatin-like protein (LOC108267382), mRNA

## Sheet: 300 g kg INT
Gene	Fold change	padj	Description
LOC124628881	-35.9276	0.0123756	major histocompatibility complex class I-related gene protein-like
XM_017473895.3	-6.06409	0.00409787	ectonucleoside triphosphate diphosphohydrolase 3 (entpd3), mRNA
XM_017481096.3	-5.62263	0.0308146	cytochrome c1, heme protein, mitochondrial (LOC108272604), mRNA
XM_017488985.3	-4.90064	0.0425984	transmembrane 7 superfamily member 2 (tm7sf2), mRNA
XM_053677621.1	-3.41524	0.0047336	tripartite motif-containing protein 16-like (LOC108262351), mRNA
XM_017493367.3	-2.33597	5.24877e-05	MAM domain containing 4 (mamdc4), mRNA
XM_047157806.2	-2.09316	0.0435116	glycine N-methyltransferase (gnmt), mRNA
XM_017451685.3	2.0258	0.0122326	immediate early response 3 (ier3), mRNA
XM_017479207.2	2.12873	0.0176918	cell death inducing DFFA like effector c (cidec), mRNA
XM_053676096.1	2.19331	0.032913	complement C3-like (LOC124627631), mRNA
XM_017481600.2	2.44973	0.0435116	JunB proto-oncogene, AP-1 transcription factor subunit b (junbb), mRNA
XM_017473763.2	2.4682	0.0182691	dual specificity phosphatase 1 (dusp1), mRNA
XM_017469189.2	2.49126	3.18219e-05	C-type lectin domain containing 1 (cldc1), mRNA
XM_017458947.3	2.63385	0.0158392	dual specificity phosphatase 5 (dusp5), mRNA
XM_017496001.2	2.65132	0.0451241	claudin f (cldnf), mRNA
XM_017471217.3	2.68426	0.0159881	complement 4B (Chido blood group) (c4b), mRNA
XM_017493507.3	2.69416	0.040543	protein phosphatase 1, regulatory subunit 3B (ppp1r3b), mRNA
XM_017487205.3	2.72984	0.000371203	peptidase inhibitor 16 (LOC108275981), mRNA
XM_017457539.3	3.04511	0.000304578	complement C3 (LOC108258708), mRNA
NM_001200747.1	3.09588	3.70407e-06	coagulation factor VIIi (f7i), mRNA
XM_017474759.3	3.84128	0.00721877	early growth response 1 (egr1), mRNA
XM_017481265.3	4.7373	0.0176918	thioredoxin interacting protein b (txnipb), mRNA
XM_017471569.3	4.79207	0.040239	complement factor H (LOC108267476), mRNA
XM_017493023.3	4.84161	0.00721877	complement component 7b (c7b), mRNA
XM_017491519.3	5.97123	0.040543	thyroid hormone responsive (thrsp), mRNA
NM_001200229.1	6.11307	0.0476018	toll-like receptor 5 (tlr-5), mRNA
XM_017471570.3	7.58121	0.0407265	alpha-2-HS-glycoprotein 2 (ahsg2), mRNA
XM_053677545.1	9.99925	3.18001e-05	tripartite motif-containing protein 16-like protein (LOC128629432), mRNA
XM_017461789.3	11.1986	0.0125116	v-fos FBJ murine osteosarcoma viral oncogene homolog Ab (fosab), mRNA
XM_017473359.3	11.41	0.00409787	FOS like 1, AP-1 transcription factor subunit a (fosl1a), mRNA
NM_001200789.1	13.4246	3.18219e-05	lysozyme c (lysc), mRNA

## Sheet: 50 g kg LIV
Gene	Fold change	padj	Description
XM_053674564.1	-98.9587	0.00370365	GC vitamin D binding protein (gc), mRNA
XM_053681637.1	-26.8887	0.0413888	tripartite motif-containing protein 16 (LOC108261734), mRNA
XM_053677621.1	-20.7767	0.00178716	tripartite motif-containing protein 16-like (LOC108262351), mRNA
XM_047150341.2	-6.97608	0.0263886	HERV-H LTR-associating 2b, tandem duplicate 2 (hhla2b.2), transcript variant X1, mRNA
XM_053677606.1	-5.49827	6.03929e-05	tripartite motif-containing protein 16-like (LOC128629447), mRNA
XR_001813569.3	-4.70348	0.0262113	DnaJ (Hsp40) homolog, subfamily C, member 27 (dnajc27), transcript variant X2, misc_RNA
XM_053686275.1	-4.22808	0.0029225	tripartite motif-containing protein 16 (LOC108261709), mRNA
XM_017454111.3	-3.84554	0.00178716	interferon-induced protein 44 (LOC108256873), mRNA
XM_053686278.1	-3.04922	0.0388552	tripartite motif-containing protein 16 (LOC124627534), mRNA
XM_017463896.3	-2.87619	0.0055994	interferon alpha-inducible protein 27-like protein 2A (LOC108263260), mRNA
NM_001200174.1	-2.677	0.0388552	myxovirus (influenza) resistance A (mxa), mRNA
XM_017492927.3	-2.58583	0.0139133	betaine-homocysteine methyltransferase (bhmt), mRNA
XM_047160688.2	-2.48928	0.00493579	E3 ubiquitin/ISG15 ligase TRIM25 (LOC108275265), mRNA
XM_053681220.1	-2.32291	0.00557543	C-C motif chemokine 18 (LOC108267255), mRNA
XM_017491674.3	-2.14277	0.0388552	diablo, IAP-binding mitochondrial protein a (diabloa), mRNA
XM_047151685.2	2.26631	6.03929e-05	lipase, hepatic a (lipca), mRNA
NM_001200201.1	11.8989	0.00178716	hepcidin antimicrobial peptide (hamp), mRNA

## Sheet: 300 g kg LIV
Gene	Fold change	padj	Description
XM_053676418.1	-51.6032	0.00381811	tripartite motif-containing protein 16 (LOC108258566), mRNA
NM_001200330.1	-41.8167	0.00296501	somatostatin 1, tandem duplicate 1 (sst1.1), mRNA
XM_017477346.3	-35.4629	1.20752e-07	fibroblast growth factor 3 (fgf3), mRNA
XM_053681428.1	-33.7922	1.11869e-09	titin (LOC108261553), mRNA
XM_053678032.1	-33.163	0.0154431	hydrocephalus-inducing protein (LOC108263948), transcript variant X2, mRNA
XM_017463210.3	-18.8153	0.0195561	H6 family homeobox 4 (hmx4), mRNA
XM_053678705.1	-17.6975	0.0497228	NLR family CARD domain-containing protein 3-like (LOC128630126), transcript variant X1, mRNA
XM_053684407.1	-7.44927	0.0141055	delta(3,5)-Delta(2,4)-dienoyl-CoA isomerase, mitochondrial (LOC128634135), mRNA
XM_053680107.1	-7.15658	3.57096e-10	phosphatidylethanolamine-binding protein 4 (LOC108265749), mRNA
XM_017494435.3	-7.0547	0.000602376	tyrosine hydroxylase 2 (th2), mRNA
XR_006981311.2	-6.60983	0.00102871	zinc finger protein 207, a (znf207a), transcript variant X2, misc_RNA
NM_001201274.2	-6.26544	0.0362275	ubiquitin cross-reactive protein (ucrp), mRNA
XM_017481096.3	-6.18579	0.0236561	cytochrome c1, heme protein, mitochondrial (LOC108272604), mRNA
XM_017454111.3	-5.62755	3.50685e-06	interferon-induced protein 44 (LOC108256873), mRNA
XR_008396304.1	-5.60585	0.00535027	GINS complex subunit 1 (Psf1 homolog) (LOC108263058), transcript variant X2, misc_RNA
XR_001813569.3	-5.55511	0.0115968	DnaJ (Hsp40) homolog, subfamily C, member 27 (dnajc27), transcript variant X2, misc_RNA
XM_017455501.3	-5.29933	0.0291628	tripartite motif-containing protein 16 (LOC108257597), mRNA
XM_017474765.3	-4.68151	0.00583929	Bardet-Biedl syndrome 7 (bbs7), mRNA
XM_053681707.1	-4.55943	0.0154431	E3 ubiquitin-protein ligase TRIM39 (LOC128628713), mRNA
XM_053678188.1	-4.547	0.013121	cyclin L1a (ccnl1a), transcript variant X3, mRNA
XM_017463896.3	-4.19449	0.00267085	interferon alpha-inducible protein 27-like protein 2A (LOC108263260), mRNA
XM_017470291.3	-4.16548	0.0115968	ddb1 and cul4 associated factor 17 (dcaf17), mRNA
XM_017452956.3	-4.13149	0.0497228	asteroid homolog 1a (aste1a), mRNA
XM_017464728.2	-4.07738	0.0081718	putative nuclease HARBI1 (LOC108263683), mRNA
XM_017473326.3	-3.80878	0.000696505	creatine kinase, mitochondrial 1 (ckmt1), mRNA
XM_017475348.3	-3.79954	0.000442275	radical S-adenosyl methionine domain containing 2 (rsad2), mRNA
XM_017490144.1	-3.69871	0.00141713	junctional adhesion molecule 3a (jam3a), transcript variant X1, mRNA
XM_053680746.1	-3.65439	0.0392583	sacsin (si:dkeyp-118h9.7), mRNA
XM_017487224.3	-3.63723	0.0104318	protein lifeguard 2 (LOC108275994), mRNA
NM_001200174.1	-3.47449	0.000506705	myxovirus (influenza) resistance A (mxa), mRNA
XM_017491305.3	-3.30413	0.00343435	E3 ubiquitin/ISG15 ligase TRIM25 (LOC108278124), mRNA
XM_017468304.3	-3.21588	0.000442275	sema domain, immunoglobulin domain (Ig), short basic domain, secreted, (semaphorin) 3H (sema3h), mRNA
XM_017481600.2	-3.19107	0.0053937	JunB proto-oncogene, AP-1 transcription factor subunit b (junbb), mRNA
XM_047152742.2	-3.1194	0.0242954	protein mono-ADP-ribosyltransferase PARP12 (LOC124626777), mRNA
XM_017451519.3	-3.09157	8.02111e-05	chemokine (C-C motif) ligand 19a, tandem duplicate 1 (ccl19a.1), mRNA
XM_053681591.1	-2.90317	0.0448522	lactose-binding lectin l-2-like (LOC128633047), mRNA
NM_001200077.1	-2.86337	0.00152909	metallothionein 2 (mt2), mRNA
LOC108257768	-2.66398	0.00649268	cytochrome P450 2D28-like, pseudogene
XM_053679365.1	-2.6379	0.0450596	interferon alpha-inducible protein 27-like protein 2A (LOC128632125), mRNA
XM_017491306.3	-2.59891	0.00485758	tripartite motif-containing protein 16 (LOC108278125), mRNA
XM_017469323.3	-2.47482	0.0283654	interferon-induced protein 44 (LOC108266244), mRNA
XM_053674266.1	-2.43688	0.0195561	protein NLRC3 (LOC128628652), mRNA
XM_053679364.1	-2.42555	0.0141509	interferon alpha-inducible protein 27-like protein 2A (LOC128632109), mRNA
XM_017491172.3	-2.40743	0.0212738	zona pellucida sperm-binding protein 4 (LOC108278047), mRNA
LOC108265791	-2.36306	0.0104318	LHFPL tetraspan subfamily member 5 protein-like
XM_017484057.3	-2.34306	0.0141055	vacuolar protein sorting 25 homolog (vps25), mRNA
XM_017496202.1	-2.21176	0.0298301	apolipoprotein A-I-1 (LOC108280791), transcript variant X2, mRNA
XM_017456722.3	-2.18996	0.0337384	zinc finger protein 41 (LOC108258217), mRNA
XM_017492702.3	-2.18245	0.0176251	protein ABHD15 (LOC108278934), mRNA
XM_017467828.3	-2.15062	0.00154986	apolipoprotein A-II (apoa2), mRNA
XM_017469514.3	-2.08693	0.0283654	death effector domain-containing 1 (dedd1), mRNA
XM_017487962.3	-2.06748	0.00140903	mitochondrial carnitine/acylcarnitine carrier protein (si:dkey-150i13.2), mRNA
XM_017470820.3	-2.04893	0.0242954	X-ray repair complementing defective repair in Chinese hamster cells 5 (xrcc5), mRNA
XM_017469052.3	-2.01589	0.0140997	protein tyrosine phosphatase receptor type Na (ptprna), mRNA
XM_017459851.3	2.02908	0.0104318	UDP-glucuronosyltransferase 2C1 (LOC108259979), transcript variant X2, mRNA
XM_017468183.3	2.04906	0.00103683	monoglyceride lipase (mgll), transcript variant X1, mRNA
XM_017471677.3	2.08424	0.0424042	cytochrome P450 26B1 (LOC108267534), mRNA
XM_017466931.3	2.21332	0.0393458	malectin (mlec), mRNA
XM_017490651.3	2.24362	0.0141055	platelet derived growth factor d (pdgfd), mRNA
XM_053681359.1	2.29434	0.00792995	zonadhesin, like (zanl), mRNA
XM_053677598.1	2.60157	0.0473061	tripartite motif-containing protein 16 (LOC108261479), mRNA
XM_017482021.3	2.64069	2.03629e-08	ATP-binding cassette, sub-family C (CFTR/MRP), member 6a (abcc6a), mRNA
XM_017482164.2	2.69794	0.00343435	calcium channel, voltage-dependent, gamma subunit 1a (cacng1a), mRNA
XM_017470271.2	2.91911	0.0257764	aryl hydrocarbon receptor (LOC108266654), mRNA
NM_001200789.1	3.01149	0.0248383	lysozyme c (lysc), mRNA
XM_017489835.3	3.21236	0.000442275	nuclear receptor interacting protein 1b (nrip1b), mRNA
XM_017491267.3	3.2449	0.00500392	myosin VIIBb (myo7bb), mRNA
XM_053686278.1	3.37793	0.00102871	tripartite motif-containing protein 16 (LOC124627534), mRNA
XM_017475128.3	4.53562	0.0338184	olfactomedin-like 1 (olfml1), mRNA
XM_053676353.1	7.62373	0.00485758	endonuclease domain-containing 1 protein (LOC108261431), mRNA
NM_001329289.1	11.7857	0.0154431	claudin 11a (cldn11a), mRNA

## Sheet: qPCR foldchange
		qPCR					Gill, Intestine, Liver and Kidney foldchange, standard error and p-value from ANOVA
	Gill				Intestine				Kidney				Liver
Gene	Sample	2-∆∆Ct	Std. Error	p-value	Sample	2-∆∆Ct	Std. Error	p-value	Sample	2-∆∆Ct	Std. Error	p-value	Sample	2-∆∆Ct	Std. Error	p-value
	Control	1	0.0682658	6.61562e-05	Control	1	0.136284	1.19814e-09	Control	1	0.11323	1.19814e-09	Control	1	0.131487	7.884e-05
TLR1	50 g/kg	1.73083	0.0929757		50 g/kg	0.249084	0.0806891		50 g/kg	0.163009	0.306853		50 g/kg	2.33288	0.172764
	100 g/kg	0.618529	0.132072		100 g/kg	0.3546	0.274123		100 g/kg	0.85411	0.058154		100 g/kg	1.96278	0.0839217
	200 g/kg	0.845325	0.0985848		200 g/kg	0.986403	0.102855		200 g/kg	1.29389	0.0994997		200 g/kg	3.4047	0.0800662
	300 g/kg	1.28533	0.0893233		300 g/kg	0.465232	0.0797306		300 g/kg	1.34552	0.10417		300 g/kg	2.08543	0.115437
	Gill				Intestine				Kidney				Liver
	Control	1	0.0698422	0.0270695	Control	1	0.106602	0.000230476	Control	1	0.200171	4.70058e-05	Control	1	0.109516	0.0111794
TLR3	50 g/kg	1.45293	0.0864651		50 g/kg	0.370627	0.0958185		50 g/kg	0.42985	0.265376		50 g/kg	1.9914	0.137562
	100 g/kg	0.749714	0.143656		100 g/kg	0.520066	0.155734		100 g/kg	0.861145	0.0620908		100 g/kg	1.15367	0.078896
	200 g/kg	0.909668	0.109533		200 g/kg	0.505313	0.0980159		200 g/kg	3.65202	0.104433		200 g/kg	3.2099	0.0852256
	300 g/kg	1.2567	0.10144		300 g/kg	0.234099	0.106099		300 g/kg	3.47179	0.111277		300 g/kg	2.28339	0.119994
	Gill				Intestine				Kidney				Liver
	Control	1	0.0911319	0.00496293	Control	1	0.169871	0.00168584	Control	1	0.184907	1.71989e-06	Control	1	0.114194	0.00156338
TLR5	50 g/kg	2.40989	0.0659086		50 g/kg	2.12585	0.0857628		50 g/kg	0.420249	0.171959		50 g/kg	1.05247	0.106835
	100 g/kg	0.956108	0.121054		100 g/kg	2.3772	0.116779		100 g/kg	0.804516	0.0645353		100 g/kg	1.18132	0.07882
	200 g/kg	1.00353	0.0996026		200 g/kg	2.42357	0.0883181		200 g/kg	1.96841	0.0956893		200 g/kg	2.7575	0.0790819
	300 g/kg	1.4756	0.0865229		300 g/kg	2.75113	0.076233		300 g/kg	1.95889	0.106331		300 g/kg	1.40397	0.151989
	Gill				Intestine				Kidney				Liver
	Control	1	0.0631189	0.0180177	Control	1	0.033181	0.0236357	Control	1	0.0944497	0.00274018	Control	1	0.129039	0.00262629
TLR9	50 g/kg	2.01131	0.0847867		50 g/kg	1.23946	0.0929921		50 g/kg	0.209398	0.316103		50 g/kg	1.42449	0.137919
	100 g/kg	0.573452	0.131167		100 g/kg	1.27686	0.191155		100 g/kg	1.05241	0.0515705		100 g/kg	1.10604	0.0966683
	200 g/kg	0.851205	0.102479		200 g/kg	1.33584	0.0989812		200 g/kg	1.6949	0.0974411		200 g/kg	3.81503	0.083147
	300 g/kg	1.63351	0.0970178		300 g/kg	1.47873	0.0871663		300 g/kg	1.80672	0.101555		300 g/kg	1.88711	0.116378
	Gill				Intestine				Kidney				Liver
	Control	1	0.113411	0.0133792	Control	1	0.266916	0.0219193	Control	1	0.155202	0.000772509	Control	1	0.198477	0.0162996
TLR20A	50 g/kg	3.92393	0.148254		50 g/kg	1.84852	0.0825506		50 g/kg	0.217409	0.345017		50 g/kg	1.66299	0.15008
	100 g/kg	0.413773	0.174634		100 g/kg	2.00592	0.195551		100 g/kg	0.945747	0.0634937		100 g/kg	1.37275	0.117101
	200 g/kg	0.539643	0.161647		200 g/kg	1.74846	0.113358		200 g/kg	2.22869	0.0979002		200 g/kg	2.39086	0.081611
	300 g/kg	2.78557	0.155879		300 g/kg	2.4941	0.0407127		300 g/kg	2.75274	0.101957		300 g/kg	1.23073	0.132956
	Gill				Intestine				Kidney				Liver
	Control	1	0.0820845	0.00209423	Control	1	0.119683	0.0278529	Control	1	0.142353	0.000806732	Control	1	0.114258	0.0321735
TLR21	50 g/kg	1.86258	0.0710912		50 g/kg	0.272729	0.0712023		50 g/kg	0.25046	0.281097		50 g/kg	2.72033	0.171932
	100 g/kg	0.672565	0.136144		100 g/kg	0.411111	0.222149		100 g/kg	0.741162	0.0624275		100 g/kg	1.28749	0.0809168
	200 g/kg	0.502633	0.111757		200 g/kg	0.881327	0.0811337		200 g/kg	1.16167	0.107423		200 g/kg	3.25471	0.0941553
	300 g/kg	1.34612	0.0895235		300 g/kg	0.683504	0.0815931		300 g/kg	1.80567	0.113026		300 g/kg	1.9301	0.117491
	Gill				Intestine				Kidney				Liver
	Control	1	0.0764525	0.216322	Control	1	0.0652121	0.00744538	Control	1	0.047463	0.711063	Control	1	0.133303	0.0128446
β2M	50 g/kg	0.752084	0.0771683		50 g/kg	0.531462	0.07538		50 g/kg	0.929421	0.102586		50 g/kg	3.38412	0.21865
	100 g/kg	0.751014	0.141218		100 g/kg	0.897157	0.128037		100 g/kg	0.892028	0.0443379		100 g/kg	1.33444	0.0969112
	200 g/kg	0.858116	0.105027		200 g/kg	0.822307	0.0967818		200 g/kg	0.787959	0.114683		200 g/kg	2.59523	0.0857165
	300 g/kg	0.791214	0.0395433		300 g/kg	1.0342	0.0826811		300 g/kg	0.78768	0.11989		300 g/kg	2.08182	0.125293
	Gill				Intestine				Kidney				Liver
	Control	1	0.0757506	0.715211	Control	1	0.0569866	5.13224e-06	Control	1	0.099127	1.36478e-24	Control	1	0.146057	0.00534061
CD4	50 g/kg	0.943198	0.069889		50 g/kg	0.395397	0.0950587		50 g/kg	0.187861	0.338201		50 g/kg	14.6936	0.114241
	100 g/kg	0.842498	0.135844		100 g/kg	0.401489	0.212679		100 g/kg	0.649617	0.0479771		100 g/kg	96.8088	0.304178
	200 g/kg	0.741445	0.111439		200 g/kg	0.632622	0.0995224		200 g/kg	1.47464	0.115038		200 g/kg	27.4588	0.0895169
	300 g/kg	0.862327	0.0406108		300 g/kg	0.544381	0.0520546		300 g/kg	2.74479	0.0635516		300 g/kg	19.8057	0.135173
	Gill				Intestine				Kidney				Liver
	Control	1	0.0691503	0.00886592	Control	1	0.0986714	7.1647e-15	Control	1	0.0345516	6.81531e-12	Control	1	0.133814	2.36908e-27
MHC II	50 g/kg	0.88718	0.0793583		50 g/kg	0.461864	0.101175		50 g/kg	0.457871	0.192018		50 g/kg	3.55853	0.23256
	100 g/kg	0.567521	0.153966		100 g/kg	0.804371	0.201883		100 g/kg	1.19646	0.0346217		100 g/kg	0.984229	0.093942
	200 g/kg	0.792827	0.114665		200 g/kg	1.04144	0.0775245		200 g/kg	1.06792	0.115311		200 g/kg	2.50249	0.0863834
	300 g/kg	0.788021	0.0444215		300 g/kg	1.19349	0.0785355		300 g/kg	1.65018	0.109871		300 g/kg	2.5645	0.12188
																2.36908e-27
	Gill				Intestine				Kidney				Liver
	Control	1	0.0690203	6.21412e-18	Control	1	0.189642		Control	1	0.14147	4.61635e-11	Control	1	0.112116	3.37526e-20
IgM	50 g/kg	2.90922	0.102962		50 g/kg	0.184886	0.0944187		50 g/kg	0.382731	0.244257		50 g/kg	1.78544	0.0923676
	100 g/kg	0.693874	0.133011		100 g/kg	0.61313	0.246485		100 g/kg	0.757505	0.0492083		100 g/kg	2.40255	0.0892575
	200 g/kg	0.670548	0.104291		200 g/kg	1.20115	0.114461		200 g/kg	2.62144	0.110327		200 g/kg	4.49253	0.0764724
	300 g/kg	1.94146	0.138292		300 g/kg	0.364803	0.106736		300 g/kg	2.29318	0.111803		300 g/kg	1.90904	0.117355
	Gill				Intestine				Kidney				Liver
	Control	1	0.0778887	2.29026e-05	Control	1	0.176499	0.0380346	Control	1	0.229138	3.14644e-09	Control	1	0.171482	0.0114782
CFD	50 g/kg	0.996402	0.0803607		50 g/kg	0.104788	0.308609		50 g/kg	0.353816	0.324177		50 g/kg	3.57708	0.180613
	100 g/kg	0.790176	0.145505		100 g/kg	0.496867	0.453073		100 g/kg	1.1129	0.0497003		100 g/kg	3.22746	0.102558
	200 g/kg	0.397101	0.10655		200 g/kg	1.52829	0.282388		200 g/kg	4.39601	0.108982		200 g/kg	4.29709	0.107149
	300 g/kg	1.04945	0.0674023		300 g/kg	0.689452	0.197793		300 g/kg	3.50403	0.107722		300 g/kg	3.25167	0.145397
	Gill				Intestine				Kidney				Liver
	Control	1	0.129512	4.69941e-10	Control	1	0.182229	0.014488	Control	1	0.0442986	1.83199e-10	Control	1	0.146474	3.24603e-05
CFC3	50 g/kg	0.382615	0.118398		50 g/kg	1.95844	0.144416		50 g/kg	3.7091	0.412937		50 g/kg	0.654266	0.102941
	100 g/kg	0.855741	0.127301		100 g/kg	4.12463	0.182052		100 g/kg	0.455649	0.0855237		100 g/kg	0.692346	0.0977158
	200 g/kg	0.302865	0.170228		200 g/kg	2.56878	0.0877018		200 g/kg	1.45602	0.148907		200 g/kg	1.73912	0.0927529
	300 g/kg	0.346191	0.129735		300 g/kg	3.60547	0.125051		300 g/kg	0.618715	0.134648		300 g/kg	1.91235	0.132444
																3.24603e-05
	Gill				Intestine				Kidney				Liver
	Control	1	0.0698229	0.00398864	Control	1	0.0863934	0.0438154	Control	1	0.24139	1.26298e-08	Control	1	0.115922	0.000796406
IL-1β type a	50 g/kg	0.737884	0.0774645		50 g/kg	1.07403	0.075919		50 g/kg	0.142537	0.472454		50 g/kg	3.00101	0.176823
	100 g/kg	0.730478	0.141435		100 g/kg	0.781472	0.15799		100 g/kg	0.738069	0.0731878		100 g/kg	1.91906	0.0796644
	200 g/kg	0.741017	0.138691		200 g/kg	1.32126	0.0946134		200 g/kg	3.6647	0.114349		200 g/kg	2.46376	0.103826
	300 g/kg	1.11701	0.092307		300 g/kg	1.21365	0.0658967		300 g/kg	2.87424	0.114572		300 g/kg	2.27287	0.118433
	Gill				Intestine				Kidney				Liver
	Control	1	0.0582972	4.99618e-10	Control	1	0.107805	9.65725e-11	Control	1	0.172021	1.88694e-11	Control	1	0.144044	0.00014032
IL-1β type b	50 g/kg	1.45882	0.0640613		50 g/kg	0.136364	0.181413		50 g/kg	0.230884	0.333604		50 g/kg	2.54991	0.186788
	100 g/kg	1.04024	0.135328		100 g/kg	0.286697	0.315068		100 g/kg	0.762334	0.0588657		100 g/kg	1.12928	0.113628
	200 g/kg	1.00179	0.115915		200 g/kg	1.00946	0.168959		200 g/kg	2.71232	0.108381		200 g/kg	1.60866	0.10116
	300 g/kg	1.26544	0.0790243		300 g/kg	1.59404	0.113661		300 g/kg	2.46203	0.111436		300 g/kg	1.57317	0.118422
	Gill				Intestine				Kidney				Liver
	Control	1	0.125036	0.436955	Control	1	0.0767384	5.53471e-31	Control	1	0.243477	2.85554e-06	Control	1	0.171771	0.0108966
IL-17	50 g/kg	0.935601	0.0788994		50 g/kg	0.172405	0.122599		50 g/kg	0.462568	0.303916		50 g/kg	2.85228	0.421653
	100 g/kg	0.731745	0.143478		100 g/kg	0.244307	0.230233		100 g/kg	1.21433	0.053203		100 g/kg	0.628681	0.177422
	200 g/kg	0.72451	0.102293		200 g/kg	0.536599	0.0793551		200 g/kg	5.11722	0.105738		200 g/kg	0.590849	0.187763
	300 g/kg	1.0067	0.0658707		300 g/kg	0.457504	0.0632374		300 g/kg	4.37671	0.106582		300 g/kg	0.183584	0.250126
	Gill				Intestine				Kidney				Liver
	Control	1	0.0650897	0.000129218	Control	1	0.167409	4.88235e-23	Control	1	0.205937	2.96489e-09	Control	1	0.216363	5.62861e-08
IFNγ	50 g/kg	1.53844	0.0652862		50 g/kg	0.157367	0.0826664		50 g/kg	0.222376	0.438519		50 g/kg	0.964564	0.287501
	100 g/kg	0.610718	0.117848		100 g/kg	1.96464	0.225968		100 g/kg	0.933137	0.0615776		100 g/kg	0.0367885	0.245512
	200 g/kg	0.722004	0.104289		200 g/kg	1.62104	0.11473		200 g/kg	3.7971	0.105994		200 g/kg	3.4383	0.0721657
	300 g/kg	1.41713	0.0676219		300 g/kg	0.429339	0.12579		300 g/kg	3.41807	0.10723		300 g/kg	3.42518	0.116741
	Gill				Intestine				Kidney				Liver
	Control	1	0.0675404	0.00932031	Control	1	0.104749	0.00781273	Control	1	0.188387	6.40566e-10	Control	1	0.143899	1.63515e-13
TNFα	50 g/kg	1.68935	0.073354		50 g/kg	0.231734	0.0861238		50 g/kg	0.35402	0.303753		50 g/kg	0.822896	0.100656
	100 g/kg	0.752317	0.126612		100 g/kg	0.254094	0.281435		100 g/kg	0.947804	0.0545021		100 g/kg	1.29122	0.268974
	200 g/kg	0.866584	0.0969131		200 g/kg	0.770348	0.0967278		200 g/kg	4.08035	0.102752		200 g/kg	11.8353	0.104454
	300 g/kg	1.23868	0.0764764		300 g/kg	0.44525	0.0548564		300 g/kg	3.55089	0.106429		300 g/kg	2.58682	0.114156
	Gill				Intestine				Kidney				Liver
	Control	1	0.0679418	0.000114869	Control	1	0.16597	2.20526e-06	Control	1	0.212733	1.88205e-06	Control	1	0.193026	1.739e-10
Hepcidin	50 g/kg	3.10007	0.147256		50 g/kg	0.226441	0.0928325		50 g/kg	0.828977	0.155359		50 g/kg	1.76188	0.182219
	100 g/kg	0.621753	0.121625		100 g/kg	1.39242	0.211226		100 g/kg	0.985204	0.0494795		100 g/kg	2.92053	0.13537
	200 g/kg	0.649955	0.141995		200 g/kg	1.19423	0.14474		200 g/kg	4.39093	0.104548		200 g/kg	11.0364	0.146034
	300 g/kg	1.99835	0.176956		300 g/kg	0.361238	0.124834		300 g/kg	3.34	0.106825		300 g/kg	3.85798	0.218294

## Sheet: Commonly expressed genes
Gene	Fold change	padj	Description
Commonly expressed genes in 50 g/kg LIV 300 g/kg LIV:
Liver (300 g/kg)
XR_001813569.3	-5.55511	0.0115968	DnaJ (Hsp40) homolog, subfamily C, member 27 (dnajc27), transcript variant X2, misc_RNA
XM_017454111.3	-5.62755	3.50685e-06	interferon-induced protein 44 (LOC108256873), mRNA
XM_053686278.1	3.37793	0.00102871	tripartite motif-containing protein 16 (LOC124627534), mRNA
XM_017463896.3	-4.19449	0.00267085	interferon alpha-inducible protein 27-like protein 2A (LOC108263260), mRNA
NM_001200174.1	-3.47449	0.000506705	myxovirus (influenza) resistance A (mxa), mRNA
Liver (50 g/kg)
XR_001813569.3	-4.70348	0.0262113	DnaJ (Hsp40) homolog, subfamily C, member 27 (dnajc27), transcript variant X2, misc_RNA
XM_017454111.3	-3.84554	0.00178716	interferon-induced protein 44 (LOC108256873), mRNA
XM_053686278.1	-3.04922	0.0388552	tripartite motif-containing protein 16 (LOC124627534), mRNA
XM_017463896.3	-2.87619	0.0055994	interferon alpha-inducible protein 27-like protein 2A (LOC108263260), mRNA
NM_001200174.1	-2.677	0.0388552	myxovirus (influenza) resistance A (mxa), mRNA
Commonly expressed genes in 300 g/kg IN 50 g/kg INT:
Intestine (300 g/kg)
NM_001200229.1	6.11307	0.0476018	toll-like receptor 5 (tlr-5), mRNA
Intestine (50 g/kg)
NM_001200229.1	4.62848	0.0400018	toll-like receptor 5 (tlr-5), mRNA
Commonly expressed genes in 300 g/kg INT 300 g/kg LIV:
Liver (300 g/kg)
XM_017481096.3	-6.18579	0.0236561	cytochrome c1, heme protein, mitochondrial (LOC108272604), mRNA
XM_017481600.2	-3.19107	0.0053937	JunB proto-oncogene, AP-1 transcription factor subunit b (junbb), mRNA
NM_001200789.1	3.01149	0.0248383	lysozyme c (lysc), mRNA
Intestine (300 g/kg)
XM_017481096.3	-5.62263	0.0308146	cytochrome c1, heme protein, mitochondrial (LOC108272604), mRNA
XM_017481600.2	2.44973	0.0435116	JunB proto-oncogene, AP-1 transcription factor subunit b (junbb), mRNA
NM_001200789.1	13.4246	3.18219e-05	lysozyme c (lysc), mRNA
Commonly expressed genes in 50 g/kg INT 300 g/kg LIV:
Liver (300 g/kg)
XM_017475348.3	-3.79954	0.000442275	radical S-adenosyl methionine domain containing 2 (rsad2), mRNA
XM_017452956.3	-4.13149	0.0497228	asteroid homolog 1a (aste1a), mRNA
Intestine (50 g/kg)
XM_017475348.3	-2.71104	2.08131e-05	radical S-adenosyl methionine domain containing 2 (rsad2), mRNA
XM_017452956.3	-2.33488	0.00371031	asteroid homolog 1a (aste1a), mRNA
Commonly expressed genes in 300 g/kg IN 50 g/kg LIV :
Intestine (300 g/kg)
XM_053677621.1	-3.41524	0.0047336	tripartite motif-containing protein 16-like (LOC108262351), mRNA
Liver (50 g/kg)
XM_053677621.1	-20.7767	0.00178716	tripartite motif-containing protein 16-like (LOC108262351), mRNA

## Sheet: Uniquely expressed genes 
Uniquely expressed genes only in 50 g/kg INTESTINE :
	Gene	Fold change	padj	Description
1	XM_017475906.3	-90.7258	2.21501e-12	up-regulator of cell proliferation-like (LOC108269832), mRNA
2	LOC124628311	-50.6958	0.0155623	carcinoembryonic antigen-related cell adhesion molecule 5-like
3	LOC128633000	-37.8948	0.0399231	carcinoembryonic antigen-related cell adhesion molecule 5-like
4	LOC108261596	-29.0716	0.00696422	B-cell receptor CD22-like
5	XM_053685643.1	-25.1244	5.44448e-09	plexin-C1 (LOC108261274), mRNA
6	XM_047154544.2	-18.6332	2.21501e-12	NLR family CARD domain-containing protein 3 (LOC124627791), mRNA
7	NM_001329275.1	-13.7542	0.0455667	putative claudin-24 (LOC108270652), mRNA
8	NM_001329262.1	-12.1545	0.0400018	rhamnose-binding lectin-like (LOC108264892), mRNA
9	XM_053681436.1	-12.1057	0.00955434	high affinity immunoglobulin gamma Fc receptor I (LOC128632991), mRNA
10	XM_053678919.1	-10.6133	0.0425349	histone H1-like (LOC128630393), mRNA
11	LOC128629329	-9.34372	0.0155623	Ig heavy chain V region TEPC 1017-like
12	XM_053685452.1	-3.52083	0.0425349	pancreatic secretory granule membrane major glycoprotein GP2 (LOC108273582), mRNA
13	XM_017491137.3	-3.12599	0.000184422	tripartite motif-containing protein 16 (LOC108278018), mRNA
14	XM_053687280.1	-3.03096	0.00803213	tripartite motif-containing protein 16 (LOC108277536), transcript variant X1, mRNA
15	XM_017467197.2	-3.01912	0.00280758	E3 ubiquitin-protein ligase NEURL3 (LOC108265088), mRNA
16	XM_017469413.3	-2.77711	0.00955434	signal transducer and activator of transcription 1b (stat1b), mRNA
17	XM_017480489.3	-2.23091	5.12623e-05	succinyl-CoA:glutarate-CoA transferase (sugct), transcript variant X2, mRNA
18	XM_017476915.3	3.44	0.00955434	epoxide hydrolase 2, cytoplasmic (ephx2), mRNA
19	XM_053687397.1	4.1776	0.00984967	apolipoprotein A1/A4/E family protein (zgc:162608), mRNA
20	XM_017459061.3	4.78233	0.0116425	myostatin a (mstna), mRNA
21	XM_017450295.3	5.82107	0.000158979	inter-alpha-trypsin inhibitor heavy chain 3a, tandem duplicate 2 (itih3a.2), mRNA
22	XM_053678020.1	6.58245	0.0182617	reelin (reln), mRNA
23	NM_001200879.1	7.65803	5.46115e-07	homogentisate 1,2-dioxygenase (hgd), mRNA
24	XM_017484464.3	9.08387	0.00186974	glucose-6-phosphatase catalytic subunit 1a, tandem duplicate 1 (g6pc1a.1), mRNA
25	XM_053682799.1	13.0957	0.0425349	ribosomal protein L13a (rpl13a), transcript variant X1, mRNA
26	XM_017471414.3	29.9408	0.00984967	cystatin-like protein (LOC108267382), mRNA
Uniquely expressed genes only in 300 g/kg INTESTINE :
1	LOC124628881	-35.9276	0.0123756	major histocompatibility complex class I-related gene protein-like
2	XM_017473895.3	-6.06409	0.00409787	ectonucleoside triphosphate diphosphohydrolase 3 (entpd3), mRNA
3	XM_017488985.3	-4.90064	0.0425984	transmembrane 7 superfamily member 2 (tm7sf2), mRNA
4	XM_017493367.3	-2.33597	5.24877e-05	MAM domain containing 4 (mamdc4), mRNA
5	XM_047157806.2	-2.09316	0.0435116	glycine N-methyltransferase (gnmt), mRNA
6	XM_017451685.3	2.0258	0.0122326	immediate early response 3 (ier3), mRNA
7	XM_017479207.2	2.12873	0.0176918	cell death inducing DFFA like effector c (cidec), mRNA
8	XM_053676096.1	2.19331	0.032913	complement C3-like (LOC124627631), mRNA
9	XM_017473763.2	2.4682	0.0182691	dual specificity phosphatase 1 (dusp1), mRNA
10	XM_017469189.2	2.49126	3.18219e-05	C-type lectin domain containing 1 (cldc1), mRNA
11	XM_017458947.3	2.63385	0.0158392	dual specificity phosphatase 5 (dusp5), mRNA
12	XM_017496001.2	2.65132	0.0451241	claudin f (cldnf), mRNA
13	XM_017471217.3	2.68426	0.0159881	complement 4B (Chido blood group) (c4b), mRNA
14	XM_017493507.3	2.69416	0.040543	protein phosphatase 1, regulatory subunit 3B (ppp1r3b), mRNA
15	XM_017487205.3	2.72984	0.000371203	peptidase inhibitor 16 (LOC108275981), mRNA
16	XM_017457539.3	3.04511	0.000304578	complement C3 (LOC108258708), mRNA
17	NM_001200747.1	3.09588	3.70407e-06	coagulation factor VIIi (f7i), mRNA
18	XM_017474759.3	3.84128	0.00721877	early growth response 1 (egr1), mRNA
19	XM_017481265.3	4.7373	0.0176918	thioredoxin interacting protein b (txnipb), mRNA
20	XM_017471569.3	4.79207	0.040239	complement factor H (LOC108267476), mRNA
21	XM_017493023.3	4.84161	0.00721877	complement component 7b (c7b), mRNA
22	XM_017491519.3	5.97123	0.040543	thyroid hormone responsive (thrsp), mRNA
23	XM_017471570.3	7.58121	0.0407265	alpha-2-HS-glycoprotein 2 (ahsg2), mRNA
24	XM_053677545.1	9.99925	3.18001e-05	tripartite motif-containing protein 16-like protein (LOC128629432), mRNA
25	XM_017461789.3	11.1986	0.0125116	v-fos FBJ murine osteosarcoma viral oncogene homolog Ab (fosab), mRNA
26	XM_017473359.3	11.41	0.00409787	FOS like 1, AP-1 transcription factor subunit a (fosl1a), mRNA
Uniquely expressed genes only in 50 g/kg LIVER :
1	XM_053674564.1	-98.9587	0.00370365	GC vitamin D binding protein (gc), mRNA
2	XM_053681637.1	-26.8887	0.0413888	tripartite motif-containing protein 16 (LOC108261734), mRNA
3	XM_047150341.2	-6.97608	0.0263886	HERV-H LTR-associating 2b, tandem duplicate 2 (hhla2b.2), transcript variant X1, mRNA
4	XM_053677606.1	-5.49827	6.03929e-05	tripartite motif-containing protein 16-like (LOC128629447), mRNA
5	XM_053686275.1	-4.22808	0.0029225	tripartite motif-containing protein 16 (LOC108261709), mRNA
6	XM_017492927.3	-2.58583	0.0139133	betaine-homocysteine methyltransferase (bhmt), mRNA
7	XM_047160688.2	-2.48928	0.00493579	E3 ubiquitin/ISG15 ligase TRIM25 (LOC108275265), mRNA
8	XM_053681220.1	-2.32291	0.00557543	C-C motif chemokine 18 (LOC108267255), mRNA
9	XM_017491674.3	-2.14277	0.0388552	diablo, IAP-binding mitochondrial protein a (diabloa), mRNA
10	XM_047151685.2	2.26631	6.03929e-05	lipase, hepatic a (lipca), mRNA
11	NM_001200201.1	11.8989	0.00178716	hepcidin antimicrobial peptide (hamp), mRNA
Uniquely expressed genes only in 300 g/kg LIVER :
1	XM_053676418.1	-51.6032	0.00381811	tripartite motif-containing protein 16 (LOC108258566), mRNA
2	NM_001200330.1	-41.8167	0.00296501	somatostatin 1, tandem duplicate 1 (sst1.1), mRNA
3	XM_017477346.3	-35.4629	1.20752e-07	fibroblast growth factor 3 (fgf3), mRNA
4	XM_053681428.1	-33.7922	1.11869e-09	titin (LOC108261553), mRNA
5	XM_053678032.1	-33.163	0.0154431	hydrocephalus-inducing protein (LOC108263948), transcript variant X2, mRNA
6	XM_017463210.3	-18.8153	0.0195561	H6 family homeobox 4 (hmx4), mRNA
7	XM_053678705.1	-17.6975	0.0497228	NLR family CARD domain-containing protein 3-like (LOC128630126), transcript variant X1, mRNA
8	XM_053684407.1	-7.44927	0.0141055	delta(3,5)-Delta(2,4)-dienoyl-CoA isomerase, mitochondrial (LOC128634135), mRNA
9	XM_053680107.1	-7.15658	3.57096e-10	phosphatidylethanolamine-binding protein 4 (LOC108265749), mRNA
10	XM_017494435.3	-7.0547	0.000602376	tyrosine hydroxylase 2 (th2), mRNA
11	XR_006981311.2	-6.60983	0.00102871	zinc finger protein 207, a (znf207a), transcript variant X2, misc_RNA
12	NM_001201274.2	-6.26544	0.0362275	ubiquitin cross-reactive protein (ucrp), mRNA
13	XR_008396304.1	-5.60585	0.00535027	GINS complex subunit 1 (Psf1 homolog) (LOC108263058), transcript variant X2, misc_RNA
14	XM_017455501.3	-5.29933	0.0291628	tripartite motif-containing protein 16 (LOC108257597), mRNA
15	XM_017474765.3	-4.68151	0.00583929	Bardet-Biedl syndrome 7 (bbs7), mRNA
16	XM_053681707.1	-4.55943	0.0154431	E3 ubiquitin-protein ligase TRIM39 (LOC128628713), mRNA
17	XM_053678188.1	-4.547	0.013121	cyclin L1a (ccnl1a), transcript variant X3, mRNA
18	XM_017470291.3	-4.16548	0.0115968	ddb1 and cul4 associated factor 17 (dcaf17), mRNA
19	XM_017464728.2	-4.07738	0.0081718	putative nuclease HARBI1 (LOC108263683), mRNA
20	XM_017473326.3	-3.80878	0.000696505	creatine kinase, mitochondrial 1 (ckmt1), mRNA
21	XM_017490144.1	-3.69871	0.00141713	junctional adhesion molecule 3a (jam3a), transcript variant X1, mRNA
22	XM_053680746.1	-3.65439	0.0392583	sacsin (si:dkeyp-118h9.7), mRNA
23	XM_017487224.3	-3.63723	0.0104318	protein lifeguard 2 (LOC108275994), mRNA
24	XM_017491305.3	-3.30413	0.00343435	E3 ubiquitin/ISG15 ligase TRIM25 (LOC108278124), mRNA
25	XM_017468304.3	-3.21588	0.000442275	sema domain, immunoglobulin domain (Ig), short basic domain, secreted, (semaphorin) 3H (sema3h), mRNA
26	XM_047152742.2	-3.1194	0.0242954	protein mono-ADP-ribosyltransferase PARP12 (LOC124626777), mRNA
27	XM_017451519.3	-3.09157	8.02111e-05	chemokine (C-C motif) ligand 19a, tandem duplicate 1 (ccl19a.1), mRNA
28	XM_053681591.1	-2.90317	0.0448522	lactose-binding lectin l-2-like (LOC128633047), mRNA
29	NM_001200077.1	-2.86337	0.00152909	metallothionein 2 (mt2), mRNA
30	LOC108257768	-2.66398	0.00649268	cytochrome P450 2D28-like, pseudogene
31	XM_053679365.1	-2.6379	0.0450596	interferon alpha-inducible protein 27-like protein 2A (LOC128632125), mRNA
32	XM_017491306.3	-2.59891	0.00485758	tripartite motif-containing protein 16 (LOC108278125), mRNA
33	XM_017469323.3	-2.47482	0.0283654	interferon-induced protein 44 (LOC108266244), mRNA
34	XM_053674266.1	-2.43688	0.0195561	protein NLRC3 (LOC128628652), mRNA
35	XM_053679364.1	-2.42555	0.0141509	interferon alpha-inducible protein 27-like protein 2A (LOC128632109), mRNA
36	XM_017491172.3	-2.40743	0.0212738	zona pellucida sperm-binding protein 4 (LOC108278047), mRNA
37	LOC108265791	-2.36306	0.0104318	LHFPL tetraspan subfamily member 5 protein-like
38	XM_017484057.3	-2.34306	0.0141055	vacuolar protein sorting 25 homolog (vps25), mRNA
39	XM_017496202.1	-2.21176	0.0298301	apolipoprotein A-I-1 (LOC108280791), transcript variant X2, mRNA
40	XM_017456722.3	-2.18996	0.0337384	zinc finger protein 41 (LOC108258217), mRNA
41	XM_017492702.3	-2.18245	0.0176251	protein ABHD15 (LOC108278934), mRNA
42	XM_017467828.3	-2.15062	0.00154986	apolipoprotein A-II (apoa2), mRNA
43	XM_017469514.3	-2.08693	0.0283654	death effector domain-containing 1 (dedd1), mRNA
44	XM_017487962.3	-2.06748	0.00140903	mitochondrial carnitine/acylcarnitine carrier protein (si:dkey-150i13.2), mRNA
45	XM_017470820.3	-2.04893	0.0242954	X-ray repair complementing defective repair in Chinese hamster cells 5 (xrcc5), mRNA
46	XM_017469052.3	-2.01589	0.0140997	protein tyrosine phosphatase receptor type Na (ptprna), mRNA
47	XM_017459851.3	2.02908	0.0104318	UDP-glucuronosyltransferase 2C1 (LOC108259979), transcript variant X2, mRNA
48	XM_017468183.3	2.04906	0.00103683	monoglyceride lipase (mgll), transcript variant X1, mRNA
49	XM_017471677.3	2.08424	0.0424042	cytochrome P450 26B1 (LOC108267534), mRNA
50	XM_017466931.3	2.21332	0.0393458	malectin (mlec), mRNA
51	XM_017490651.3	2.24362	0.0141055	platelet derived growth factor d (pdgfd), mRNA
52	XM_053681359.1	2.29434	0.00792995	zonadhesin, like (zanl), mRNA
53	XM_053677598.1	2.60157	0.0473061	tripartite motif-containing protein 16 (LOC108261479), mRNA
54	XM_017482021.3	2.64069	2.03629e-08	ATP-binding cassette, sub-family C (CFTR/MRP), member 6a (abcc6a), mRNA
55	XM_017482164.2	2.69794	0.00343435	calcium channel, voltage-dependent, gamma subunit 1a (cacng1a), mRNA
56	XM_017470271.2	2.91911	0.0257764	aryl hydrocarbon receptor (LOC108266654), mRNA
57	XM_017489835.3	3.21236	0.000442275	nuclear receptor interacting protein 1b (nrip1b), mRNA
58	XM_017491267.3	3.2449	0.00500392	myosin VIIBb (myo7bb), mRNA
59	XM_017475128.3	4.53562	0.0338184	olfactomedin-like 1 (olfml1), mRNA
60	XM_053676353.1	7.62373	0.00485758	endonuclease domain-containing 1 protein (LOC108261431), mRNA
61	NM_001329289.1	11.7857	0.0154431	claudin 11a (cldn11a), mRNA
